# Supplementary material for: Stability and transformation products of rubber-derived chemicals in various storage conditions
Source: Royal Society of Chemistry journal article supplement (doi:10.1039/d5em01025j), 2026-01-01
Supplement: d5em01025j2.xlsx [file d5em01025j2.xlsx]

## Sheet: Table of Contents
Table	Descriptor
Table S1	RDC Standard Information and Vendor Information
Table S2	Standard Mixture Volumes
Table S3	Targeted Gradient and Electrospray Details
Table S4	Targeted Quant Precusor and Product Ions
Table S5	Non-targeted Gradient and Electrospray Details
Table S6	Non-targeted Scan Details
Table S7	Inter/Intra Day Precision and IDL/IQL
Table S8	Compounds that experienced initial large loss
Table S9	Mixed Standard and Single Standards Shared Features and Confidence Levels
Table S10	Mixed Standard Features and Confidence Levels
Table S11	Single Standard Features and Confidence Levels
Table S12	Skyline Settings
Table S13	Concetration Data for Targeted Compounds
Table S14	Normalized Peak Area for Semi-Quant Compounds

## Sheet: Table S1
Table S1: RDC Standard Information and Vendor Information
Analyte	Abbreviation	Formula	CAS#	Vendor	Role In Study	Matched Isotopic Standard
1,3-Dicyclohexylurea		C13H24N2O	2387-23-7	Sigma-Aldrich	Non-Targeted Only
1,3-di-o-tolylguanidine	DOTG	C15H17N3	97-39-2	Sigma-Aldrich	Targeted and Non-Targeted	DPG-d10
1,3-diphenylguanidine	DPG	C13H13N3	102-06-7	Alfa Aesar	Targeted and Non-Targeted	DPG-d10
1,3-diphenylurea		C13H12N2O	102-07-8	Sigma-Aldrich	Non-Targeted Only
1H-benzotriazole	1H-BTR	C6H5N3	95-14-7	HPC Standards Inc.	Targeted and Non-Targeted	DPG-d10
2-(4-Morpholinyl)benzothiazole	24MoBT	C11H12N2OS	4225-26-7	Enamine	Targeted and Non-Targeted	DPG-d10
2-(Methylthio)benzothiazole	2-Me-S-BTH	C8H7NS2	615-22-5	Sigma-Aldrich	Non-Targeted Only
2,2,4-trimethyl-1,2,3,4-tetrahydroquinoline		C12H17N	4497-58-9	AmBeed, Inc.	Targeted and Non-Targeted	DPG-d10
2,2,4-Trimethyl-1,2-dihydroquinoline	TMQ	C12H15N	147-47-7	AmBeed, Inc.	Targeted and Non-Targeted	DPG-d10
2-aminobenzothiazole	2-amino-BTH	C7H6N2S	136-95-8	Sigma-Aldrich	Targeted and Non-Targeted	DPG-d10
2-mercaptobenzothiazole	MBT	C7H5NS2	149-30-4	Sigma-Aldrich	Targeted and Non-Targeted	DPG-d10
4-aminodiphenylamine	4-ADPA	C12H12N2	101-54-2	TCI America	Targeted and Non-Targeted	DPG-d10
4-Hydroxydiphenylamine	4-HDPA	C12H11NO	122-37-2	TCI America	Targeted and Non-Targeted	DPG-d10
4-Nitrosodiphenylamine	4s DPA	C12H10N2O	156-10-5	TCI America	Targeted and Non-Targeted	DPG-d10
4-phenylazodiphenylamine		C18H15N3	101-75-7	Sigma-Aldrich	Non-Targeted Only
6PPD-quinone	6PPD-Q	C18H22N2O2	2754428-18-5	HPC Standards Inc.	Targeted and Non-Targeted	6PPD-Q-d5
Benzanilide		C13H11NO	93-98-1	Sigma-Aldrich	Non-Targeted Only
Benzothiazole	BTH	C7H5NS	95-16-9	Sigma-Aldrich	Non-Targeted Only
Benzyl Butyl Phthalate	BBP	C19H20O4	85-68-7	Sigma-Aldrich	Non-Targeted Only
Caprolactam		C6H11NO	105-60-2	Sigma-Aldrich	Targeted and Non-Targeted	DPG-d10
Dicyclohexyamine		C12H23N	101-83-7	Sigma-Aldrich	Targeted and Non-Targeted	DPG-d10
Hexa(methoxymethyl)melamine	HMMM	C15H30N6O6	3089-11-0	Combi Blocks Inc.	Targeted and Non-Targeted	DPG-d10
N-(1,3-Dimethylbutyl)-N'-phenyl-p-phenylenediamine	6PPD	C18H24N2	793-24-8	Sigma-Aldrich	Targeted and Non-Targeted	DPG-d10
N,N′-bis(methylphenyl)-1,4-benzenediamine quinone	DTPD-Q	C20H18N2O2		Cayman Chemicals	Targeted and Non-Targeted	6PPD-Q-d5
N,N′-diphenyl-p-phenylenediamine quinone	DPPD-Q	C18H14N2O2	555754	Cayman Chemicals	Targeted and Non-Targeted	6PPD-Q-d5
N,N'-Diphenyl-p-phenylenediamine	DPPD	C18H16N2	74-31-7	Sigma-Aldrich	Targeted and Non-Targeted	6PPD-Q-d5
N1, N4-bis(2-methylphenyl)-1,4-benzenediamine	DTPD	C20H20N2	620-91-7	Cayman Chemicals	Targeted and Non-Targeted	6PPD-Q-d5
N-Cyclohexyl-2-benzothiazol-amine	NCBA	C13H16N2S	28291-75-0	ChemScene LLC	Targeted and Non-Targeted	DPG-d10
N-Cyclohexyl-N-methylcyclohexanamine		C13H25N	7560-83-0	ChemScene LLC	Targeted and Non-Targeted	DPG-d10
N-Isopropyl-N'-phenyl-1,4-phenylenediamine	IPPD	C15H18N2	101-72-4	AmBeed, Inc.	Targeted and Non-Targeted	DPG-d10
N-phenyl-1-naphthylamine		C16H13N	90-30-2	Acros Organics	Targeted and Non-Targeted	6PPD-Q-d5
Oligomeric-(2,2,4-Trimethyl-1,2-dihydroquinoline)	Oligomeric-TMQ	(C12H15N)n	26780-96-1	AmBeed, Inc.	Non-Targeted Only
Isotopically Labeled Standards
BTH-d4	BTH-d4	C7H1D4NS	194423-51-3	LGC Standards	Targeted and Non-Targeted
DPG-d10	DPG-d10	C13H3D10N3		Toronto Research Chemicals Inc.	Targeted and Non-Targeted
6PPD-Q-d5	6PPD-Q-d5	C18H17D5N2O2		HPC Standards	Targeted and Non-Targeted
5-Methylbenzotriazole-d6		C7HD6N3	1246820-65-4	LGC Standards	Targeted and Non-Targeted
1H-Benzotriazole-d4		C6HD4N3	1185072-03-0	Medchem Express	Targeted and Non-Targeted
2,2,4-Trimethyl-1,2-dihydroquinoline-d4	TMQ-d4	C12D4H11N		LGC Standards	Targeted and Non-Targeted
Diphenylamine-d10		C12HD10N	37055-51-9	Cambridge Isotope Labs	Targeted and Non-Targeted
2-Mercaptobenzothiazole-d4	MBT-d4			LGC Standards	Targeted and Non-Targeted

## Sheet: Table S2
Table S2: Standard Mixture Volumes
Sample Name	Native Standard Mix at 2,500 ng/mL (mL)	Isotopically Labeled Internal Standard Mix at 5,000 ng/mL (mL)	Glutathione Solution (mL)	DI Water (mL)	MeOH (mL)	pH 2 DI Water (mL)
DI Water Control	1	0.2	NA	8.8	NA	NA
Methanol Control	1	0.2	NA	NA	8.8	NA
pH 2	1	0.2	NA	NA	NA	8.8
Glutathione in DI Water	1	0.2	0.4	8.4	NA	NA
Glutathione in MeOH	1	0.2	0.4	NA	8.4	NA

## Sheet: Table S3
Table S3: Targeted Gradient and Electrospray Details
Gradient Details
Time (min)	A (%)	B (%)	Flow (mL/min)	Max Pressure Limit (bar)
0	95	5	0.6	400
0.08	95	5	0.6	400
3.33	15	85	0.6	400
5	0	100	0.6	400
6.67	0	100	0.6	400
6.7	95	5	0.6	400
10	95	5	0.6	400
ESI Details
Spray Ionization (V)	3000
Sheath Gas (Arbitrary Units)	50
Aux Gas (Arbitrary Units)	15
Ion Transfer Tube (C)	380
Vaporizer Tube (C)	350

## Sheet: Table S4
Table S4: Targeted Quant Precusor and Product Ions
Compound	Start Time (min)	End Time (min)	Precursor (m/z)	Product (m/z)	Collision Energy (V)
Caprolactam(+1)	2	2.4	114.091	55.143	23.1
Caprolactam(+1)	2	2.4	114.091	65	24.5
Caprolactam(+1)	2	2.4	114.091	79.125	16.8
2-amino-BTH(+1)	2	2.5	151.032	109	27
2-amino-BTH(+1)	2	2.5	151.032	124.1	27
1H-BTR(+1)	2.8	3.2	120.056	39.1	35
1H-BTR(+1)	2.8	3.2	120.056	64.982	28
1H-BTR(+1)	2.8	3.2	120.056	77.054	26
1H-BTR(+1)	2.8	3.2	120.056	103.125	18
DPG-d10(+1)	2.9	3.3	222.181	99.125	21.8
DPG-d10(+1)	2.9	3.3	222.181	124.054	23.4
DPG-d10(+1)	2.9	3.3	222.181	205.225	21
4-ADPA(+1)	3	3.4	185.107	93.1	22
4-ADPA(+1)	3	3.4	185.107	108	24
4-ADPA(+1)	3	3.4	185.107	167	29
DPG(+1)	3	3.4	212.118	94.1	19.9
DPG(+1)	3	3.4	212.118	119.071	21.6
DPG(+1)	3	3.4	212.118	195.125	18.3
N-Cyclohexyl-N-methylcyclohexanamine(+1)	3.2	3.6	196.206	83.1	21
N-Cyclohexyl-N-methylcyclohexanamine(+1)	3.2	3.6	196.206	114.1	18
Dicyclohexyamine(+1)	3.3	3.7	182.19	82.911	20.16
Dicyclohexyamine(+1)	3.3	3.7	182.19	100.054	15.87
DOTG(+1)	3.3	3.7	240.15	106.046	30.2
DOTG(+1)	3.3	3.7	240.15	115.982	32
DOTG(+1)	3.3	3.7	240.15	133.118	21.3
5-Methylbenzotriazole-d6(+1)	3.4	3.8	140	81	28.84
5-Methylbenzotriazole-d6(+1)	3.4	3.8	140	85.125	22.02
2,2,4-trimethyl-1,2,3,4-tetrahydroquinoline(+1)	3.4	3.8	176.143	77	42.5
2,2,4-trimethyl-1,2,3,4-tetrahydroquinoline(+1)	3.4	3.8	176.143	103.143	31
2,2,4-trimethyl-1,2,3,4-tetrahydroquinoline(+1)	3.4	3.8	176.143	119.929	18.2
1H-Benzotriazole-d4(+1)	3.7	4.1	124.08	69.025	26.78
1H-Benzotriazole-d4(+1)	3.7	4.1	124.08	96.075	18.61
BTH(+1)	3.7	4.2	136.022	65.039	35
BTH(+1)	3.7	4.2	136.022	109.054	26.1
BTH-d4(+1)	3.7	4.1	140.047	69.06	35
BTH-d4(+1)	3.7	4.1	140.047	112.03	25
BTH-d4(+1)	3.7	4.1	140.047	113.04	27
IPPD(+1)	3.7	4.1	227.154	107.054	41
IPPD(+1)	3.7	4.1	227.154	184.125	17.5
IPPD(+1)	3.7	4.1	227.154	212.226	18.6
MBT(+1)	3.8	4.3	167.994	65.15	34
MBT(+1)	3.8	4.3	167.994	92	21
MBT(+1)	3.8	4.3	167.994	124	22
MBT(+1)	3.8	4.3	167.994	135	26
2-Mercaptobenzothiazole-d4(+1)	3.8	4.2	172.02	138.982	26.36
2-Mercaptobenzothiazole-d4(+1)	3.8	4.2	172.02	140.042	9.47
4-HDPA(+1)	4	4.5	186.091	80.15	42
4-HDPA(+1)	4	4.5	186.091	92	20
4-HDPA(+1)	4	4.5	186.091	109	24
Benzanilide(+1)	4	4.5	198.091	76.982	33
Benzanilide(+1)	4	4.5	198.091	105.143	18.4
Benzanilide(+1)	4	4.5	198.091	120.071	15.3
24MoBT(+1)	4.1	4.5	221.074	135.946	28.8
24MoBT(+1)	4.1	4.5	221.074	150.125	27.3
24MoBT(+1)	4.1	4.5	221.074	177	22.6
HMMM(+1)	4.1	4.5	391.23	207.1	19.4
HMMM(+1)	4.1	4.5	391.23	283.129	14
HMMM(+1)	4.1	4.5	391.23	359.218	8.4
1,3-diphenylurea(+1)	4.2	4.6	213.102	65	47
1,3-diphenylurea(+1)	4.2	4.6	213.102	77	35
1,3-diphenylurea(+1)	4.2	4.6	213.102	94	18
6PPD(+1)	4.2	4.6	269.201	93.1	31
6PPD(+1)	4.2	4.6	269.201	107.1	47
6PPD(+1)	4.2	4.6	269.201	184	22
TMQ(+1)	4.3	4.7	174.128	130.054	31.7
TMQ(+1)	4.3	4.7	174.128	144.143	26.7
TMQ(+1)	4.3	4.7	174.128	158.071	25.3
2,2,4-Trimethyl-1,2-dihydroquinoline-d4(+1)	4.3	4.7	177.145	135.125	19.49
2,2,4-Trimethyl-1,2-dihydroquinoline-d4(+1)	4.3	4.7	177.145	147.125	28.88
4s DPA(+1)	4.3	4.7	199.087	128	41
4s DPA(+1)	4.3	4.7	199.087	169	20
4s DPA(+1)	4.3	4.7	199.087	181.1	27
NCBA(+1)	4.3	4.7	233.111	55.118	29.8
NCBA(+1)	4.3	4.7	233.111	83.1	22.7
NCBA(+1)	4.3	4.7	233.111	151.018	20
2-Me-S-BTH(+1)	4.5	5	182.009	109.071	38.3
2-Me-S-BTH(+1)	4.5	5	182.009	135	36.2
2-Me-S-BTH(+1)	4.5	5	182.009	166.929	24.2
1,3-Dicyclohexylurea(+1)	4.5	4.9	225.196	61.071	25.9
1,3-Dicyclohexylurea(+1)	4.5	4.9	225.196	83.171	24.1
1,3-Dicyclohexylurea(+1)	4.5	4.9	225.196	100.1	15.7
Diphenylamine-d10(+1)	4.6	5	179.151	174.929	34.32
Diphenylamine-d10(+1)	4.6	5	179.151	177.083	24.88
DPPD-Q(+1)	4.6	5	291.113	77.05	48
DPPD-Q(+1)	4.6	5	291.113	144	30
DPPD-Q(+1)	4.6	5	291.113	235.154	27.8
DPPD-Q(+1)	4.6	5	291.113	263.1	21.1
DPPD(+1)	4.8	5.2	260.13	139	62
DPPD(+1)	4.8	5.2	260.13	167	36
6PPD-Q(+1)	4.8	5.2	299.175	187.1	27
6PPD-Q(+1)	4.8	5.2	299.175	215.029	17.2
6PPD-Q(+1)	4.8	5.2	299.175	241.1	25
6PPD-Q-d5(+1)	4.8	5.2	304.207	192.1	29
6PPD-Q-d5(+1)	4.8	5.2	304.207	220.171	17.4
6PPD-Q-d5(+1)	4.8	5.2	304.207	246.171	30
DTPD-Q(+1)	4.8	5.2	319.144	184.125	23.4
DTPD-Q(+1)	4.8	5.2	319.144	212.143	19.6
DTPD-Q(+1)	4.8	5.2	319.144	301.137	25.2
N-phenyl-1-naphthylamine(+1)	4.9	5.3	220.112	127.97	28
N-phenyl-1-naphthylamine(+1)	4.9	5.3	220.112	142.071	19.3
N-phenyl-1-naphthylamine(+1)	4.9	5.3	220.112	143.071	30.8
Benzyl Butyl Phthalate(+1)	4.9	5.4	313.143	91.113	23.96
Benzyl Butyl Phthalate(+1)	4.9	5.4	313.143	148.899	14.31
4-phenylazodiphenylamine(+1)	5.1	5.7	274.134	105.071	17
4-phenylazodiphenylamine(+1)	5.1	5.7	274.134	169.125	23.6
4-phenylazodiphenylamine(+1)	5.1	5.7	274.134	181.125	37
DTPD(+1)	5.1	5.5	289.17	182.97	28.34
DTPD(+1)	5.1	5.5	289.17	198.143	23.7

## Sheet: Table S5
Table 5: Non-targeted Gradient and Electrospray Details
Gradient Details
Time (min)	A (%)	B (%)	Flow (mL/min)	Max Pressure Limit (bar)
0	95	5	0.4	1000
0.55	70	30	0.4	1000
11	0	100	0.4	1000
13.2	0	100	0.4	1000
13.3	95	5	0.4	1000
15	95	5	0.4	1000
ESI Details
Spray Ionization (V)	3000
Sheath Gas (Arbitrary Units)	50
Aux Gas (Arbitrary Units)	15
Ion Transfer Tube (C)	325
Vaporizer Tube (C)	350

## Sheet: Table S6
Table S6: Non-targeted Scan Details
Global Settings
Infusion Mode	Liquid Chromatography
Expected LC Peak Width (s)	6
Advanced Peak Determination	Yes
Mild Trapping	No
Default Charge State	1
Enable Xcalibur AcquireX method modifications	No
Internal Mass Calibration	EASY-IC™
Mode	Run Start
Full Scan
Resolution	60000
Scan Range	100 to 1500
RF Lens	0.8
AGC Target	Standard
Maximum Injection Time	Auto
Data Dependent Scan
Resolution	30000
Collision Energy Type	Absolute
HCD Collision Energies	20,40, 70
AGC Target	Standard
Maximum Injection Time	100 ms

## Sheet: Table S7
Table S7: Inter/Intra Day Precision and IDL/IQL
Molecule	Intra-Day 5 CV (n=5)	Intra-Day 100 CV (n=5)		Inter-Day 5 CV (n=3)	Inter-Day 100 CV (n=3)		IDL (ng/mL)	IQL (ng/mL)
Caprolactam	0.160671	0.0364117		0.230109	0.0215629		1.5658	4.6974
1H-BTR	0.0605856	0.0296503		0.0723292	0.012562		0.54506	1.63518
2-amino-BTH	0.0725158	0.0353776		0.0611587	0.0205414		0.43853	1.31559
MBT	0.126944	0.0814838		0.0740538	0.0556171		0.57387	1.72161
TMQ	0.100879	0.0723901		0.114243	0.0382437		1.4812	4.4436
2,2,4-trimethyl-1,2,3,4-tetrahydroquinoline	0.0188576	0.0559355		0.0859787	0.00710057		0.24261	0.72783
2-Me-S-BTH	0.0289042	0.0287975		0.0710098	0.03756		0.98665	2.95995
4-ADPA	0.0288051	0.0465594		0.309054	0.0183126		2.4083	7.2249
4-HDPA	0.0519451	0.0729279		0.0757906	0.0218859		2.459	7.377
N-Cyclohexyl-N-methylcyclohexanamine	0.083038	0.0508298		0.0744431	0.0098025		0.94133	2.82399
Benzanilide	0.0680189	0.049396		0.0474549	0.0576872		0.13819	0.41457
4s DPA	0.0660582	0.0736984		0.0939572	0.0310687		0.033003	0.099009
DPG	0.0646851	0.0644772		0.112994	0.030282		0.10647	0.31941
1,3-diphenylurea	0.115486	0.0454868		0.0165798	0.0443965		0.067579	0.202737
N-phenyl-1-naphthylamine	0.0796686	0.0400289		0.0605646	0.0839249		0.26872	0.80616
24MoBT	0.0174739	0.0324081		0.0471622	0.0176352		0.13417	0.40251
1,3-Dicyclohexylurea	0.0690031	0.060718		0.0455092	0.0337104		0.27648	0.82944
IPPD	0.0132065	0.0270365		0.0338967	0.0439235		3.6781	11.0343
NCBA	0.0508102	0.0414973		0.109016	0.0169752		0.078698	0.236094
DOTG	0.0458465	0.0485383		0.0125196	0.027168		0.08969	0.26907
DPPD	0.0917422	0.0458497		0.0201556	0.0235886		0.53761	1.61283
4-phenylazodiphenylamine	0.0449506	0.0441255		0.0534123	0.040202		0.7318	2.1954
6PPD-Q	0.0421791	0.0644262		0.0260203	0.015089		0.1209	0.3627
DTPD-Q	0.0441339	0.0598706		0.0235188	0.0171158		0.31108	0.93324
HMMM	0.108764	0.0410696		0.0610288	0.00520413		0.064826	0.194478
Dicyclohexyamine	0.0892458	0.0291446		0.449783	0.0298076		0.24129	0.72387

## Sheet: Table S8
Table S8: Compounds that experienced initial large loss
Compound	Condition
4-HDPA	FZ - pH2 Water
	RF - pH2 Water
	RT - pH2 Water
4s DPA	FZ - pH2 Water
	FZ - Glutathione in Water
	RF - pH2 Water
	RF - Glutathione in Water
	RT - pH2 Water
	RT - Glutathione in Water
N-phenyl-1-naphthylamine	FZ - pH2 Water
	FZ - Glutathione in Water
	RF - pH2 Water
	RT - pH2 Water
DPPD	FZ - pH2 Water
	FZ - Water
	FZ - Glutathione in Water
	RF - pH2 Water
	RF - Water
	RF - Glutathione in Water
	RT - pH2 Water
	RT - Water
	RT - Glutathione in Water
HMMM	FZ - pH2 Water
	FZ - Glutathione in Water
	RF - pH2 Water
	RF - Glutathione in Water
	RT - pH2 Water
	RT - Glutathione in Water

## Sheet: Table S9
Table S9: Mixed Standard and Single Standards Shared Features and Confidence Levels
Name	Parent Compound	TP/Impurity/Fast Forming TP	Confidence Level
1,2-dihydro-2,2,4,7-tetramethylquinoline	TMQ	Fast forming TP or Impurity	2a
2,2-Dithiobis(benzothiazole)	MBT	TP	2a
2,4-dimethylquinoline	TMQ	TP	1
2-Aminophenol	4s DPA	TP	2a
2-Benzthiazolylsulphenic acid	MBT	TP	2a
4-Aminophenol	4s DPA	TP	2a
4-Nitrosophenol	4s DPA	TP	3
Impurity 215	4s DPA/ 4-ADPA	Impurity	3
Impurity 447	MBT	Impurity	3
Melamine	HMMM	TP	2a
Methylene Melamine	HMMM	TP	3
N-(methoxymethyl)-1,3,5-triazine-2,4,6-triamine (MonoMMM)	HMMM	TP	2a
TP 132	TMQ	Fast forming TP or Impurity	4
TP 157	HMMM	TP	4
TP 159	TMQ	Fast forming TP or Impurity	5
TP 172	TMQ	Fast forming TP or Impurity	4
TP 185	4s DPA	Fast forming TP or Impurity	3
TP 188a	TMQ	TP	3
TP 188b	TMQ	Fast forming TP or Impurity	4
Tp 188c	TMQ	TP	3
TP 188d	TMQ	Fast forming TP or Impurity	4
TP 190	TMQ	TP	3
TP 213a	4-ADPA	Fast forming TP or Impurity	4
TP 213b	4s DPA/ 4-ADPA	Fast forming TP or Impurity	4
TP 214	4-ADPA	TP	3
TP 215b	4s DPA/ 4-ADPA	Fast forming TP or Impurity	3
TP 216	4-ADPA	TP	4
TP 216	TMQ	Fast forming TP or Impurity	3
TP 218	TMQ	TP	4
TP 230a	4-ADPA	TP	4
TP 230b	4-ADPA	TP	4
TP 244	4-ADPA	TP	4
TP 264	4s DPA	Fast forming TP or Impurity	5
TP 283	HMMM	Fast forming TP or Impurity	4
TP 321a	4-ADPA	TP	4
TP 321b	4-ADPA	TP	4
TP 329	TMQ	TP	4
TP 331	4-ADPA	TP	4
TP 335	4-ADPA	TP	4
TP 345	MBT	Fast forming TP or Impurity	4
TP 345	TMQ	TP	2
TP 377	HMMM	Fast forming TP or Impurity	4
TP 381	4-ADPA	Fast forming TP or Impurity	3
TP 396	4-ADPA	TP	4
TP 432	MBT	Fast forming TP or Impurity	4
TP 434	MBT	Fast forming TP or Impurity	5
TP 547	4-ADPA	TP	3

[truncated: 5 more sheets: Table S10, Table S11, Table S12, Table S13, Table S14]
